# Supplementary material
Source: PubMed Central journal article supplement (PMC1501284)
Supplement: neo0706_0623SD1.pdf [file neo0706_0623SD1.pdf]

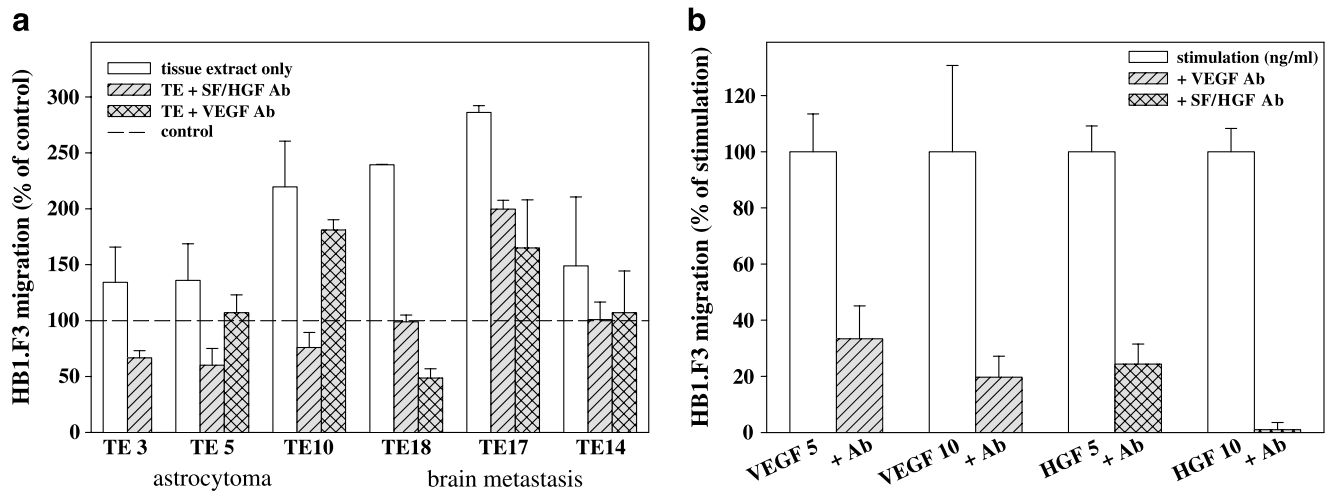

**Figure W1.** Biologic activity of SF/HGF and VEGF in the protein extracts. (a) Tumor protein extracts (TE) derived from the surgical specimen of human astrocytoma and brain metastasis were assayed at a fixed protein concentration of 400 mg/ml in the modified Boyden chamber assay. Neutralizing antibodies (Ab) to HGF/SF and VEGF at 20 mg/ml were added individually to the extracts in the same experiment (TE 3, 5, 10: astrocytoma; TE 18, 17, 14: brain metastasis). The inhibitory effects of the neutralizing antibodies demonstrated that the growth factors retained their biologic activity within the complex environment of brain tumors represented by the protein extracts. However, incomplete blocking of NSC migration in some cases may point to the presence and/or interactions of other factors influencing NSC migration. Due to the limited amount of protein extracts, not every extract could be tested. (b) In control experiments, we determined the neutralizing capacity of the individual antibodies on human NSC migration when stimulated by VEGF (5 and 10 ng/ml) and (SF/HGF (10 ng/ml) in the absence or presence of neutralizing Ab. All antibodies were used at 20 mg/ml. Values shown are mean  $\pm$  SE of quadruplicate determinations.
